# Supplementary material for: Prevalence of isolated diastolic hypertension and the risk of cardiovascular mortality among adults aged 40 years and older in northeast China: a prospective cohort study
Source: HighWire-hosted journal article supplement (doi:10.1136/bmjopen-2022-061762), 2022-09-01
Supplement: bmjopen-2022-061762supp001_data_supplement.pdf [file bmjopen-2022-061762supp001_data_supplement.pdf]

Supplemental Table 1. The univariate Cox regression analyses for the hazard ratio of CVD death.

| Variables                                    | Number of events | HR (95%CI)         | P      |
|----------------------------------------------|------------------|--------------------|--------|
| <b>Age group</b>                             |                  |                    |        |
| 40-49                                        | 8                | ref.               | -      |
| 50-59                                        | 27               | 1.74 (0.79-3.83)   | 0.17   |
| 60-69                                        | 83               | 4.56 (2.21-9.42)   | <0.001 |
| ≥70                                          | 196              | 22.34 (11.02-45.3) | <0.001 |
| <b>Sex</b>                                   |                  |                    |        |
| Men                                          | 188              | ref.               | -      |
| Women                                        | 126              | 2.36 (1.88-2.96)   | <0.001 |
| <b>Education</b>                             |                  |                    |        |
| Primary school or lower                      | 242              | ref.               | -      |
| Middle school                                | 57               | 0.31 (0.23-0.41)   | <0.001 |
| High school or above                         | 15               | 0.26 (0.15-0.43)   | <0.001 |
| <b>Annual household income (yuan)</b>        |                  |                    |        |
| <5000                                        | 185              | ref.               | -      |
| 5000-9999                                    | 52               | 0.52 (0.38-0.71)   | <0.001 |
| 10000-19999                                  | 30               | 0.31 (0.21-0.46)   | <0.001 |
| ≥20000                                       | 47               | 0.28 (0.20-0.39)   | <0.001 |
| <b>BMI, kg/m<sup>2</sup></b>                 | -                | 0.87 (0.84-0.90)   | <0.001 |
| <b>Current Smoking (yes vs. no)</b>          | 106 vs. 208      | 1.55 (1.22-1.95)   | <0.001 |
| <b>Current Drinking (yes vs. no)</b>         | 75 vs. 239       | 0.87 (0.67-1.13)   | 0.31   |
| <b>History of AF (yes vs. no)</b>            | 26 vs. 288       | 8.14 (5.45-12.16)  | <0.001 |
| <b>History of stroke (yes vs. no)</b>        | 75 vs. 239       | 4.87 (3.76-6.32)   | <0.001 |
| <b>History of heart disease (yes vs. no)</b> | 43 vs. 271       | 2.62 (1.90-3.61)   | <0.001 |
| <b>Diabetes (yes vs. no)</b>                 | 64 vs. 248       | 1.30 (0.98-1.70)   | 0.07   |
| <b>Dyslipidemia (yes vs. no)</b>             | 80 vs. 232       | 0.65 (0.51-0.84)   | 0.001  |
| <b>Lack of exercise (yes vs. no)</b>         | 142 vs. 172      | 5.21 (4.17-6.51)   | <0.001 |
